# Supplementary figures and images for: Halloysite nanotube-supported bismuth catalysts for acetylene hydrochlorination
Source: Royal Society of Chemistry journal article supplement (doi:10.1039/d3nj00919j), 2023-01-01

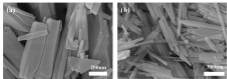

Supplement: d3nj00919j3.pdf [file d3nj00919j3.pdf]

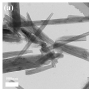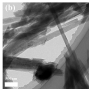

Supplement: d3nj00919j4.pdf [file d3nj00919j4.pdf]
